# Supplementary material for: Psychosocial Distress among Family Members of COVID-19 Patients Admitted to Hospital and Isolation Facilities in the Philippines: A Prospective Cohort Study
Source: MDPI journal article supplement (doi:10.3390/jcm11175236), 2022-09-05
Supplement: s1 [file s1]

**Supplemental Table S1.** Instrument scores of patients' family members at 2 and 8 weeks after discharge of their relatives with COVID-19 from the study sites (N = 74).

| Instruments       | Scores  |      |         |      | <i>P value</i> |
|-------------------|---------|------|---------|------|----------------|
|                   | 2 weeks |      | 8 weeks |      |                |
|                   | Mean    | SD   | Mean    | SD   |                |
| HADS-P Anxiety    | 7.24    | 4.60 | 5.04    | 3.83 | < 0.001        |
| HADS-P Depression | 4.28    | 3.79 | 3.31    | 3.05 | 0.007          |
| Family APGAR      | 9.34    | 1.17 | 9.24    | 1.73 | 0.604          |
| SCREEM RES        | 26.27   | 4.47 | 25.99   | 4.71 | 0.547          |
